# Supplementary material
Source: PubMed Central journal article supplement (PMC8686831)
Supplement: NIHMS1764225-supplement-Supplementary.pdf [file NIHMS1764225-supplement-Supplementary.pdf]

# **Supporting Information**

**PARP Targeted Auger Therapy in p53 Mutant Colon Cancer  
Xenograft Mouse Models**

Figure S1

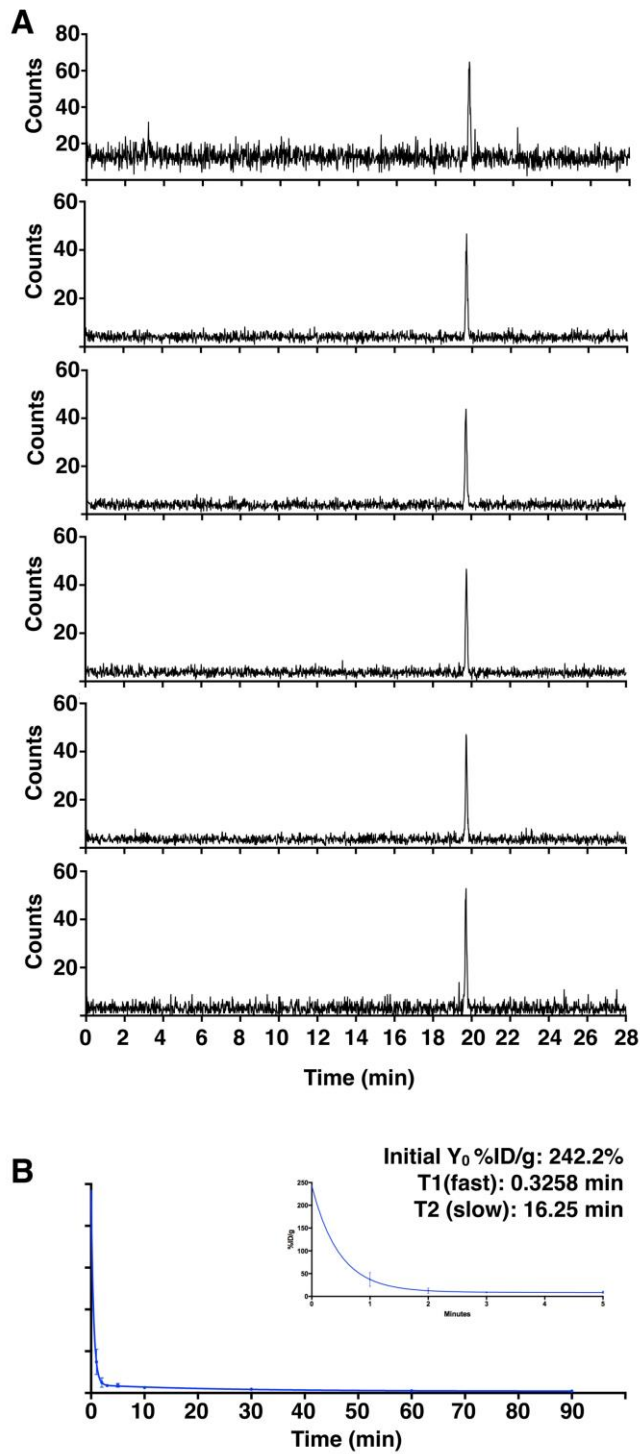

**Figure S1. In vitro evaluation of  $^{123}\text{I}$ -MAPi serum stability and blood half-life. (A)** Stability of  $^{123}\text{I}$ -MAPi in 10% FBS serum at 0, 5, 30, 60, 120, 1440 mins time points via Radio-HPLC. **(B)** Blood half-life of  $^{123}\text{I}$ -MAPi in healthy nude mice.

**Table S1**

|                       | D2 Veh M |        | D15 Veh M |        | D2 Treat M |         | D15 Treat M |        | D2 Veh F |        | D15 Veh F |        | Day 2 Treat F |        | D15 Treat F |        |
|-----------------------|----------|--------|-----------|--------|------------|---------|-------------|--------|----------|--------|-----------|--------|---------------|--------|-------------|--------|
|                       | Mean     | SD     | Mean      | SD     | Mean       | SD      | Mean        | SD     | Mean     | SD     | Mean      | SD     | Mean          | SD     | Mean        | SD     |
| <b>AST (U/L)</b>      | 72.20    | 26.85  | 58.20     | 19.54  | 75.80      | 44.35   | 83.60       | 30.91  | 82.80    | 21.74  | 52.20     | 8.70   | 118.00        | 96.45  | 68.60       | 12.20  |
| <b>ALT (U/L)</b>      | 70.80    | 33.43  | 67.20     | 26.49  | 47.20      | 26.78   | 113.40      | 64.30  | 39.20    | 21.53  | 34.00     | 13.55  | 65.40         | 77.65  | 31.80       | 12.99  |
| <b>ALP (U/L)</b>      | 100.60   | 43.45  | 83.80     | 28.85  | 93.20      | 12.77   | 88.40       | 28.22  | 141.00   | 88.23  | 100.40    | 19.68  | 147.20        | 53.09  | 112.00      | 22.35  |
| <b>GGT (U/L)</b>      | 2.00     | 0.00   | 2.00      | 0.00   | 2.00       | 0.00    | 2.00        | 0.00   | 2.00     | 0.00   | 2.00      | 0.00   | 2.00          | 0.00   | 2.00        | 0.00   |
| <b>CK (U/L)</b>       | 700.40   | 702.45 | 286.80    | 197.78 | 919.20     | 1598.82 | 463.00      | 311.33 | 464.40   | 283.80 | 381.40    | 276.28 | 418.40        | 203.96 | 313.20      | 157.69 |
| <b>TBIL (umol/L)</b>  | 1.30     | 0.00   | 2.68      | 0.85   | 1.56       | 0.58    | 4.68        | 2.93   | 1.30     | 0.00   | 1.30      | 0.00   | 1.30          | 0.00   | 1.30        | 0.00   |
| <b>UREA (nmol/L)</b>  | 4.88     | 0.50   | 5.32      | 0.58   | 5.14       | 0.25    | 5.32        | 0.45   | 5.38     | 1.48   | 5.20      | 0.76   | 4.74          | 0.53   | 4.66        | 0.43   |
| <b>CREAT (umol/L)</b> | 11.00    | 4.12   | 8.00      | 0.00   | 8.00       | 0.00    | 8.00        | 0.00   | 11.00    | 4.12   | 14.80     | 4.09   | 8.00          | 0.00   | 8.00        | 0.00   |
| <b>GLU (nmol/L)</b>   | 10.97    | 1.66   | 9.20      | 0.63   | 11.87      | 1.34    | 8.90        | 1.13   | 11.44    | 1.52   | 9.21      | 1.60   | 11.55         | 0.92   | 9.55        | 1.52   |
| <b>CHOL (nmol/L)</b>  | 3.92     | 0.80   | 3.96      | 0.53   | 9.15       | 13.11   | 3.33        | 0.64   | 2.24     | 0.26   | 2.51      | 0.48   | 2.13          | 0.37   | 2.46        | 0.21   |
| <b>TRIG (nmol/L)</b>  | 0.97     | 0.35   | 1.31      | 0.57   | 0.97       | 0.28    | 1.53        | 1.06   | 0.99     | 0.16   | 1.17      | 0.35   | 1.78          | 0.64   | 0.98        | 0.32   |
| <b>TPROT (g/L)</b>    | 51.48    | 3.04   | 48.14     | 1.60   | 49.92      | 2.48    | 47.80       | 2.47   | 49.32    | 1.01   | 49.02     | 1.85   | 48.96         | 2.98   | 49.90       | 2.35   |
| <b>ALB (g/L)</b>      | 33.34    | 2.10   | 31.10     | 0.91   | 31.42      | 1.91    | 28.42       | 4.40   | 34.46    | 1.44   | 36.02     | 0.99   | 34.58         | 2.88   | 36.56       | 1.86   |
| <b>GLOB (g/L)</b>     | 18.14    | 1.33   | 17.04     | 1.42   | 18.50      | 0.84    | 17.38       | 1.31   | 14.86    | 2.23   | 13.00     | 1.40   | 14.38         | 1.89   | 13.34       | 0.70   |
| <b>A/G Ratio</b>      | 1.86     | 0.11   | 1.82      | 0.18   | 1.70       | 0.10    | 1.74        | 0.11   | 2.36     | 0.40   | 2.80      | 0.31   | 8.04          | 12.84  | 2.76        | 0.13   |
| <b>Ca (mmol/L)</b>    | 2.46     | 0.05   | 2.41      | 0.06   | 2.47       | 0.06    | 2.41        | 0.04   | 2.43     | 0.05   | 2.58      | 0.16   | 2.45          | 0.06   | 2.44        | 0.07   |
| <b>Na (mmol/L)</b>    | 150.80   | 1.10   | 149.80    | 1.48   | 148.00     | 1.00    | 149.00      | 1.41   | 149.00   | 2.24   | 148.40    | 2.07   | 147.80        | 1.64   | 149.40      | 1.67   |
| <b>K (mmol/L)</b>     | 4.78     | 0.37   | 4.58      | 0.38   | 4.92       | 0.30    | 4.43        | 0.28   | 4.08     | 0.22   | 3.80      | 0.34   | 4.66          | 0.23   | 4.00        | 0.10   |
| <b>Cl (mmol/L)</b>    | 106.80   | 2.77   | 87.80     | 44.63  | 105.60     | 0.55    | 106.50      | 1.73   | 108.00   | 2.12   | 108.00    | 2.24   | 106.60        | 2.07   | 109.00      | 2.12   |
| <b>Phos (mmol/L)</b>  | 2.68     | 0.20   | 2.13      | 0.22   | 2.73       | 0.38    | 2.51        | 0.48   | 2.60     | 0.33   | 2.18      | 0.43   | 2.68          | 0.29   | 2.19        | 0.07   |

**Table S1.** Complete Toxicity Report of <sup>127</sup>I-PARPi in healthy mice at 2 days and 15 days post compound administration. Veh: Vehicle; Treat:<sup>127</sup>I-PARPi treated mice at 2.05 mg/kg; D: Day.

Figure S2

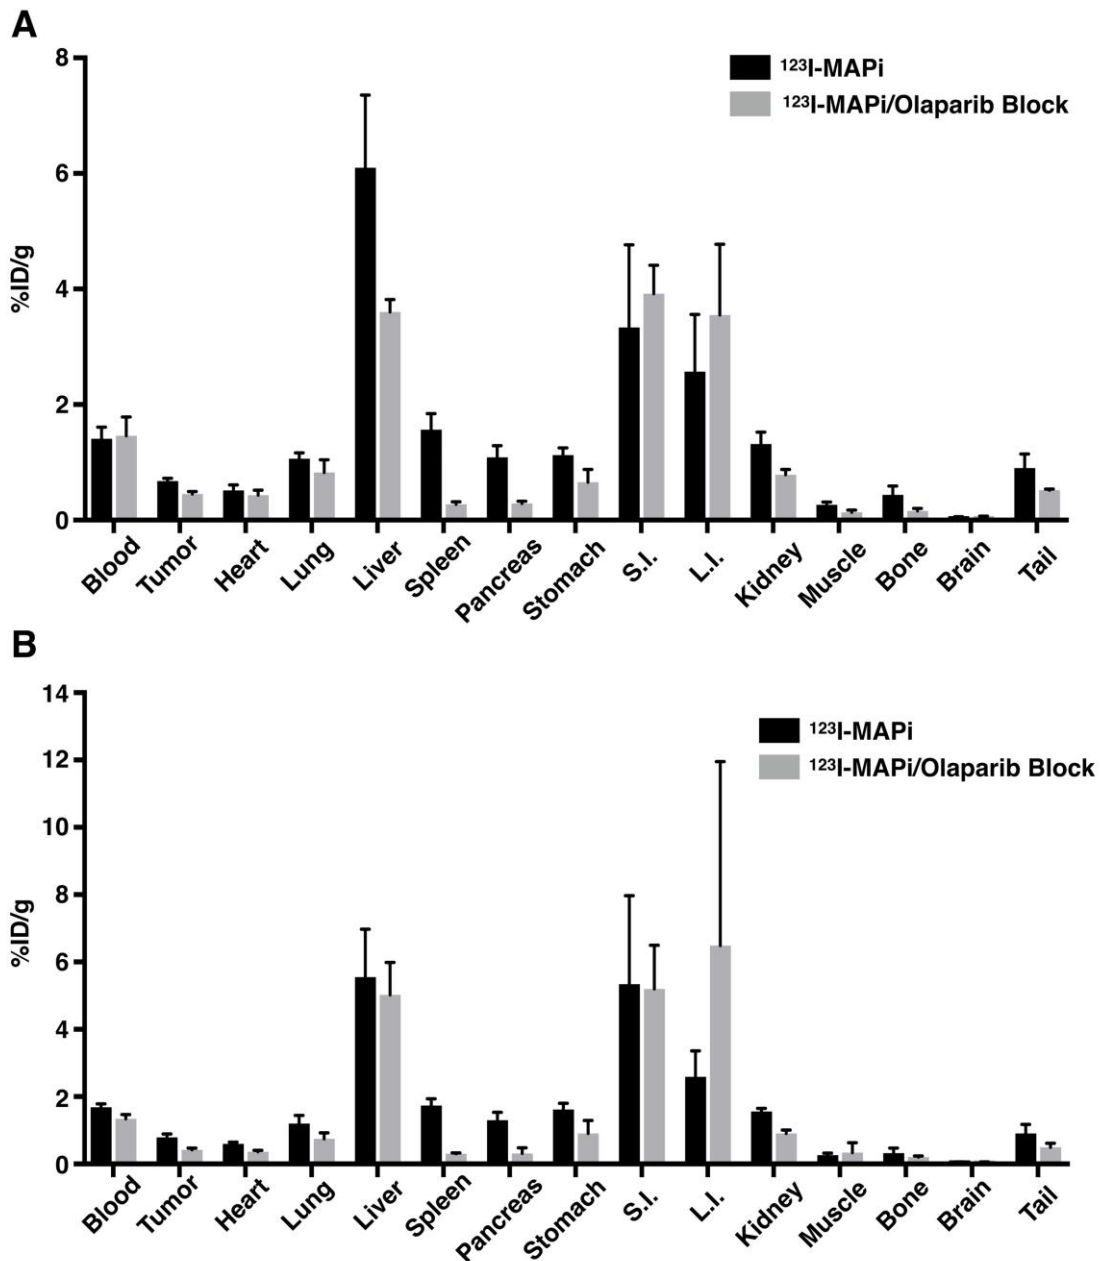

**Figure S2. Biodistribution of  $^{123}\text{I}$ -MAPi in human colorectal cancer HCT116 p53<sup>+/+</sup> (A) and HCT116 p53<sup>-/-</sup> (B) mouse models 1 hour post administration.** Animals were treated when implanted tumors were ~100 mm<sup>3</sup> size. For blocking, a 1000-fold excess of Olaparib was administered intravenously 1 hour prior to intravenously injection of  $^{123}\text{I}$ -MAPi. At 1 hour time point post administration of  $^{123}\text{I}$ -MAPi, mice were sacrificed and acute biodistribution studies were carried out.

**Table S2**

| <b>A</b> |  | <b><sup>123</sup>I-MAPi</b> |        |        | <b><sup>123</sup>I-MAPi /Olaparib Block</b> |        |        |
|----------|--|-----------------------------|--------|--------|---------------------------------------------|--------|--------|
| Blood    |  | 1.2091                      | 1.3940 | 1.6171 | 1.0866                                      | 1.6093 | 1.6866 |
| Tumor    |  | 0.6233                      | 0.7164 | 0.6866 | 0.4055                                      | 0.4583 | 0.4908 |
| Heart    |  | 0.4071                      | 0.5511 | 0.5848 | 0.3501                                      | 0.4336 | 0.5217 |
| Lung     |  | 0.9695                      | 1.0555 | 1.1687 | 0.8728                                      | 0.5852 | 1.0144 |
| Liver    |  | 6.0895                      | 4.8405 | 7.3633 | 3.5086                                      | 3.8517 | 3.4427 |
| Spleen   |  | 1.5275                      | 1.3147 | 1.8630 | 0.2263                                      | 0.2931 | 0.3076 |
| Pancreas |  | 0.9104                      | 1.0471 | 1.3063 | 0.2461                                      | 0.2913 | 0.3245 |
| Stomach  |  | 1.0135                      | 1.1003 | 1.2618 | 0.5478                                      | 0.5188 | 0.9084 |
| SI       |  | 4.1151                      | 1.6841 | 4.2073 | 4.4507                                      | 3.8278 | 3.4800 |
| LI       |  | 3.6340                      | 1.6808 | 2.3940 | 4.5088                                      | 2.1684 | 3.9714 |
| Kidney   |  | 1.1173                      | 1.3034 | 1.5282 | 0.6849                                      | 0.8133 | 0.8588 |
| Muscle   |  | 0.2086                      | 0.2911 | 0.2909 | 0.1269                                      | 0.1094 | 0.1796 |
| Bone     |  | 0.2552                      | 0.5397 | 0.5117 | 0.1244                                      | 0.1502 | 0.2102 |
| Brain    |  | 0.0498                      | 0.0454 | 0.0590 | 0.0345                                      | 0.0477 | 0.0688 |
| Tail     |  | 0.8088                      | 0.7186 | 1.1788 | 0.5051                                      | 0.5044 | 0.5409 |

  

| <b>B</b> |  | <b><sup>123</sup>I-MAPi</b> |        |        | <b><sup>123</sup>I-MAPi /Olaparib Block</b> |        |        |
|----------|--|-----------------------------|--------|--------|---------------------------------------------|--------|--------|
| Blood    |  | 1.7908                      | 1.6018 | 1.6667 | 1.4771                                      | 1.3287 | 1.2191 |
| Tumor    |  | 0.8524                      | 0.8526 | 0.6786 | 0.4349                                      | 0.4616 | 0.3654 |
| Heart    |  | 0.6540                      | 0.5514 | 0.5848 | 0.4068                                      | 0.3712 | 0.3229 |
| Lung     |  | 1.2943                      | 0.9283 | 1.3799 | 0.9042                                      | 0.7806 | 0.5649 |
| Liver    |  | 6.5471                      | 3.9199 | 6.1782 | 5.7902                                      | 3.9461 | 5.3489 |
| Spleen   |  | 1.8844                      | 1.5066 | 1.8136 | 0.3131                                      | 0.3212 | 0.2789 |
| Pancreas |  | 1.2013                      | 1.1407 | 1.5683 | 0.4880                                      | 0.3075 | 0.1479 |
| Stomach  |  | 1.8089                      | 1.4524 | 1.6034 | 1.0497                                      | 1.2030 | 0.4728 |
| SI       |  | 2.4670                      | 5.9398 | 7.6217 | 3.7147                                      | 5.7827 | 6.1045 |
| LI       |  | 3.4051                      | 2.4935 | 1.8646 | 12.7054                                     | 4.3060 | 2.4479 |
| Kidney   |  | 1.5454                      | 1.4841 | 1.6631 | 1.0057                                      | 0.9151 | 0.8008 |
| Muscle   |  | 0.2276                      | 0.2474 | 0.3249 | 0.2222                                      | 0.1331 | 0.6729 |
| Bone     |  | 0.4417                      | 0.3729 | 0.1577 | 0.2401                                      | 0.1857 | 0.1795 |
| Brain    |  | 0.0555                      | 0.0652 | 0.0632 | 0.0608                                      | 0.0555 | 0.0431 |
| Tail     |  | 1.0911                      | 0.6057 | 1.0282 | 0.6161                                      | 0.4951 | 0.3884 |

**Table S2.** Bio-distribution tables for <sup>123</sup>I-MAPi in selected cell lines expressed as %ID/g. The values reported are at 1 hour post administration of <sup>123</sup>I-MAPi. For blocking doses, a 1000-fold excess of Olaparib was injected 1 hour prior to administration of <sup>123</sup>I-MAPi A) HCT116 p53<sup>+/+</sup>; B) HCT116 p53<sup>-/-</sup>.

Figure S3

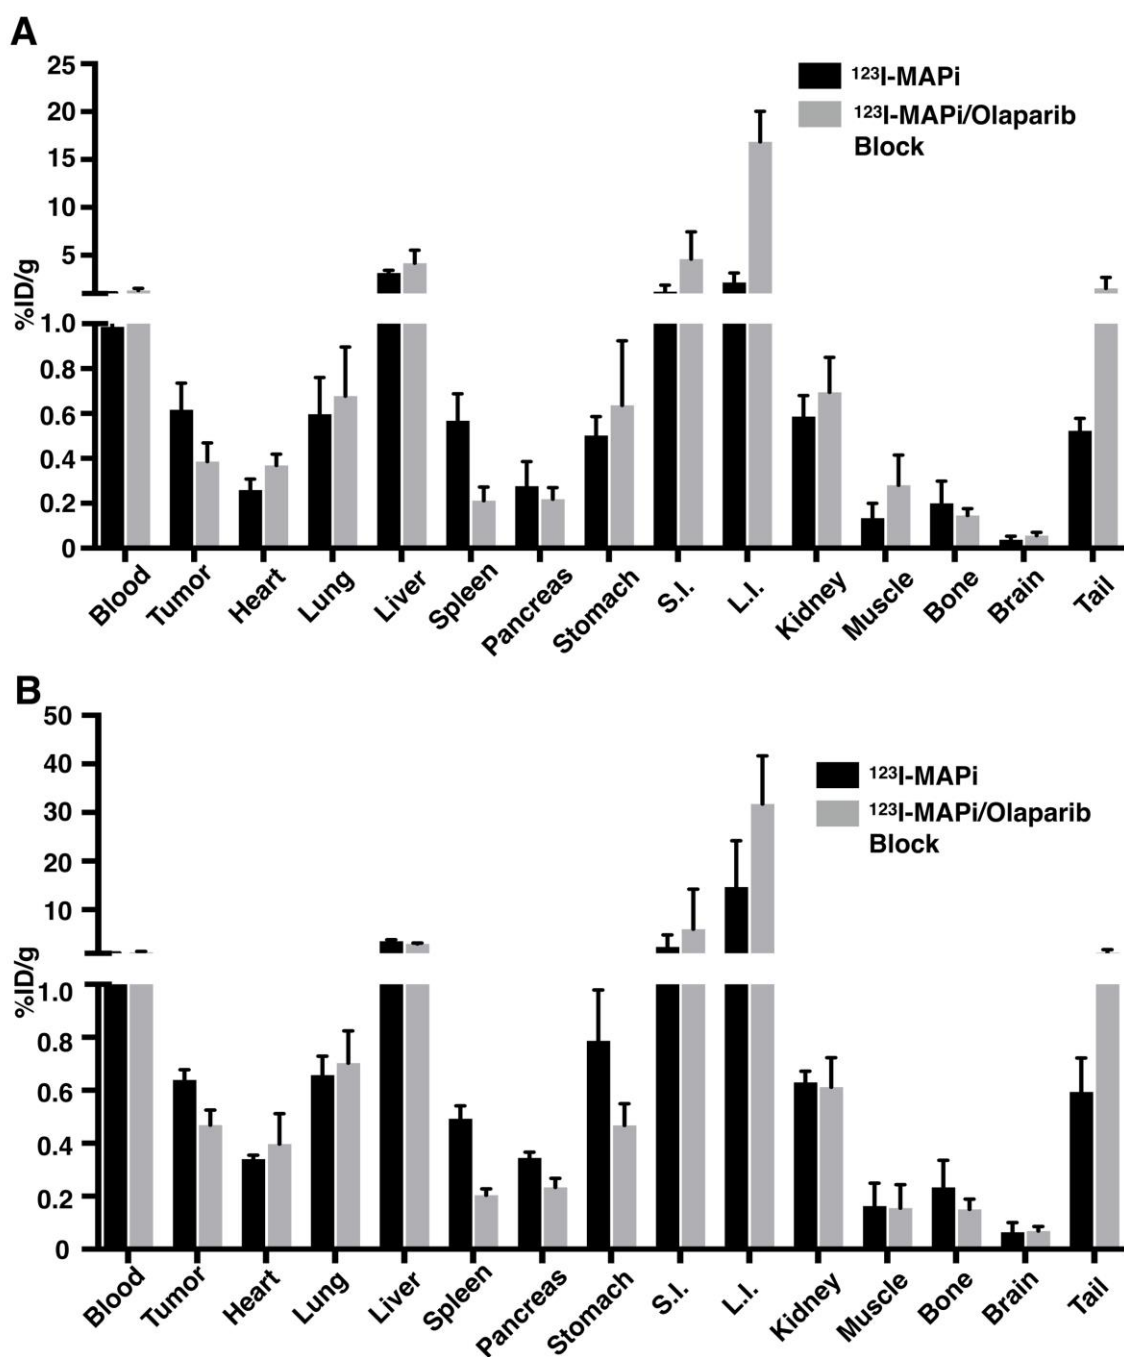

**Figure S3. Biodistribution of  $^{123}\text{I}$ -MAPi in human colorectal cancer (A) HCT116 p53<sup>+/+</sup> and (B) HCT116 p53<sup>-/-</sup> mouse models 2 hours post administration.** Animals were treated when implanted tumors were ~100 mm<sup>3</sup> size. For blocking, a 1000-fold excess Olaparib was administered intravenously 1 hour prior to intravenously injection of  $^{123}\text{I}$ -MAPi. At 2-hour time point post administration of  $^{123}\text{I}$ -MAPi, mice were sacrificed and acute biodistribution studies carried out.

**Table S3****A**

|          | <sup>123</sup> I-MAPi |        |        | <sup>123</sup> I-MAPi/Olaparib Block |         |         |
|----------|-----------------------|--------|--------|--------------------------------------|---------|---------|
| Blood    | 0.8712                | 1.0531 | 1.0358 | 1.0795                               | 1.3765  | 1.4920  |
| Tumor    | 0.5103                | 0.5920 | 0.7462 | 0.2966                               | 0.3964  | 0.4634  |
| Heart    | 0.2195                | 0.2421 | 0.3145 | 0.3131                               | 0.3858  | 0.4079  |
| Lung     | 0.4173                | 0.6379 | 0.7371 | 0.4244                               | 0.8032  | 0.8036  |
| Liver    | 2.9662                | 2.9940 | 3.4830 | 3.9109                               | 2.9619  | 5.6420  |
| Spleen   | 0.4290                | 0.6227 | 0.6506 | 0.1482                               | 0.2168  | 0.2691  |
| Pancreas | 0.1848                | 0.3973 | 0.2460 | 0.1596                               | 0.2352  | 0.2598  |
| Stomach  | 0.4589                | 0.4478 | 0.5998 | 0.3228                               | 0.8874  | 0.7006  |
| SI       | 0.5605                | 1.9073 | 1.1094 | 3.1649                               | 2.7170  | 7.8900  |
| LI       | 1.0840                | 3.0538 | 2.3576 | 16.8327                              | 20.0430 | 13.7128 |
| Kidney   | 0.4795                | 0.6531 | 0.6269 | 0.5619                               | 0.6575  | 0.8660  |
| Muscle   | 0.2083                | 0.1102 | 0.0817 | 0.3706                               | 0.1255  | 0.3438  |
| Bone     | 0.0938                | 0.2900 | 0.2146 | 0.1186                               | 0.1432  | 0.1773  |
| Brain    | 0.0194                | 0.0506 | 0.0412 | 0.0424                               | 0.0530  | 0.0723  |
| Tail     | 0.5138                | 0.5831 | 0.4736 | 0.8678                               | 0.9083  | 2.8453  |

**B**

|          | <sup>123</sup> I-MAPi |        |         | <sup>123</sup> I-MAPi/Olaparib Block |         |         |
|----------|-----------------------|--------|---------|--------------------------------------|---------|---------|
| Blood    | 1.1004                | 1.0121 | 1.0123  | 1.0717                               | 1.1335  | 1.4296  |
| Tumor    | 0.6146                | 0.6208 | 0.6835  | 0.4420                               | 0.4292  | 0.5345  |
| Heart    | 0.3404                | 0.3265 | 0.3556  | 0.3419                               | 0.3202  | 0.5286  |
| Lung     | 0.6021                | 0.7387 | 0.6325  | 0.5887                               | 0.6897  | 0.8311  |
| Liver    | 3.6451                | 3.7099 | 3.1251  | 2.8951                               | 2.7917  | 3.1608  |
| Spleen   | 0.4395                | 0.5023 | 0.5351  | 0.1946                               | 0.1862  | 0.2312  |
| Pancreas | 0.3534                | 0.3618 | 0.3210  | 0.2084                               | 0.2180  | 0.2727  |
| Stomach  | 0.8854                | 0.9099 | 0.5656  | 0.4659                               | 0.5501  | 0.3853  |
| SI       | 5.1336                | 0.5365 | 1.4126  | 1.2278                               | 1.2788  | 15.5024 |
| LI       | 15.9482               | 4.5189 | 23.4676 | 40.3057                              | 20.8862 | 34.0345 |
| Kidney   | 0.6785                | 0.6058 | 0.6069  | 0.5174                               | 0.5842  | 0.7343  |
| Muscle   | 0.2622                | 0.1112 | 0.1160  | 0.0793                               | 0.2519  | 0.1344  |
| Bone     | 0.3512                | 0.1772 | 0.1722  | 0.1189                               | 0.1410  | 0.1926  |
| Brain    | 0.1044                | 0.0538 | 0.0359  | 0.0550                               | 0.0646  | 0.0877  |
| Tail     | 0.6389                | 0.6941 | 0.4497  | 0.6382                               | 1.8537  | 0.9909  |

**Table S3.** Bio-distribution tables for <sup>123</sup>I-MAPi in selected cell lines expressed as %ID/g. The values reported are at 2-hour post administration of <sup>123</sup>I-MAPi. For blocking doses, a 1000-fold excess of Olaparib was injected 1 hour prior to administration of <sup>123</sup>I-MAPi A) HCT116 p53<sup>+/+</sup>; B) HCT116 p53<sup>-/-</sup>.

**Table S4**

|             | Blood  | Heart  | Lungs   | Liver  | Spleen | Pancreas | Stomach | SI     | LI     | Kidney | Muscle | Bone   | Skin   | Brain  | Thyroid | Tail   |
|-------------|--------|--------|---------|--------|--------|----------|---------|--------|--------|--------|--------|--------|--------|--------|---------|--------|
| <b>1Hr</b>  | 0.7450 | 0.5404 | 1.1869  | 6.0143 | 1.8582 | 1.0658   | 1.9038  | 3.7463 | 1.0700 | 1.3800 | 0.2731 | 0.8953 | 0.7235 | 0.2047 | 10.5948 | 0.6188 |
|             | 1.2346 | 0.4845 | 0.7615  | 5.7361 | 1.4992 | 0.7153   | 1.0303  | 4.0654 | 0.5836 | 0.8388 | 0.3950 | 0.6302 | 1.0055 | 0.0662 | 4.5140  | 4.2079 |
|             | 1.9542 | 0.8865 | 1.5766  | 8.6314 | 1.9973 | 1.8237   | 2.4565  | 2.0768 | 1.2960 | 1.8073 | 0.9805 | 1.2229 | 1.2092 | 0.0995 | 6.0327  | 1.3386 |
| <b>6Hr</b>  | 0.2352 | 0.0990 | 0.6195  | 1.4511 | 0.0804 | 0.0570   | 0.1589  | 0.1915 | 0.3155 | 0.1212 | 0.0302 | 0.0316 | 0.1030 | 0.0055 | 0.0570  | 0.2960 |
|             | 0.3208 | 0.0883 | 1.1556  | 1.3561 | 0.1041 | 0.0998   | 0.1721  | 0.3023 | 0.6827 | 0.1387 | 0.0290 | 0.0560 | 0.1080 | 0.1446 | 0.0725  | 0.2377 |
|             | 0.6944 | 0.2615 | 0.7276  | 1.1969 | 0.1338 | 0.1265   | 0.2924  | 0.2930 | 0.7559 | 0.2906 | 0.0579 | 0.0596 | 0.2111 | 0.0248 | 0.1414  | 0.3614 |
| <b>15Hr</b> | 0.0805 | 0.0160 | 0.0324  | 0.4665 | 0.0157 | 0.0139   | 0.0935  | 0.0789 | 0.0929 | 0.0476 | 0.0054 | 0.0079 | 0.0446 | 0.0018 | 0.0128  | 0.0555 |
|             | 0.0879 | 0.0212 | 0.0844  | 0.5821 | 0.0234 | 0.0160   | 0.0667  | 0.0672 | 0.0706 | 0.0514 | 0.0239 | 0.0091 | 0.0562 | 0.0024 | 3.6231  | 0.1246 |
|             | 0.0648 | 0.0208 | 0.0406  | 0.4915 | 0.0185 | 0.0300   | 0.0408  | 0.0841 | 0.1563 | 0.0437 | 0.0076 | 0.0061 | 0.0376 | 0.0024 | 0.0204  | 0.1089 |
| <b>24Hr</b> | 0.0153 | 0.0051 | 0.0964  | 0.1444 | 0.0064 | 0.0037   | 0.0116  | 0.0134 | 0.0255 | 0.0095 | 0.0010 | 0.0050 | 0.0086 | 0.0002 | 0.0051  | 0.0214 |
|             | 0.0147 | 0.0056 | 0.0146  | 0.1549 | 0.0036 | 0.0039   | 0.0300  | 0.0184 | 0.0819 | 0.0108 | 0.0003 | 0.0000 | 0.0097 | 0.0003 | 0.0000  | 0.3483 |
|             | 0.0104 | 0.0149 | 0.8216  | 0.0007 | 0.0464 | 0.0670   | 0.2311  | 0.3343 | 0.0059 | 0.0027 | 0.0031 | 0.3826 | 0.0000 | 0.0058 | 3.9427  | 0.0000 |
| <b>48Hr</b> | 0.0061 | 0.0023 | 0.0032  | 0.0833 | 0.0025 | 0.0010   | 0.0102  | 0.0046 | 0.0111 | 0.0063 | 0.0011 | 0.0000 | 0.0046 | 0.0006 | 0.0145  | 0.1397 |
|             | 0.0064 | 0.0037 | -0.0003 | 0.0840 | 0.0024 | 0.0041   | 0.0037  | 0.0020 | 0.0062 | 0.0062 | 0.0017 | 0.0013 | 0.0040 | 0.0000 | 0.0014  | 0.0277 |
|             | 0.0088 | 0.0024 | 0.0042  | 0.1015 | 0.0006 | 0.0017   | 0.0081  | 0.0020 | 0.0039 | 0.0087 | 0.0000 | 0.0000 | 0.0089 | 0.0000 | 1.7667  | 0.0594 |

**Table S4.** Bio-distribution of <sup>123</sup>I-MAPi in healthy athymic nude mice. All numbers expressed as %ID/g



**Table S5**

| Tissue                                          | <sup>123</sup> I-MAPI   |               |
|-------------------------------------------------|-------------------------|---------------|
|                                                 | Absorbed Dose (rad/mCi) |               |
|                                                 | <i>Mouse</i>            | <i>Human</i>  |
| Adrenals                                        |                         | 0.00556       |
| Brain                                           | 0.124                   | 0.00124       |
| Breasts                                         |                         | 0.00285       |
| Gallbladder Wall                                |                         | 0.00800       |
| Lower Large Intestine Wall                      | 1.72                    | 0.0295        |
| Small Intestine                                 | 3.29                    | 0.01320       |
| Stomach Wall                                    | 1.90                    | 0.00503       |
| Upper Large Intestine Wall                      | 1.72                    | 0.01100       |
| Heart Wall                                      | 2.15                    | 0.00449       |
| Kidneys                                         | 2.68                    | 0.00598       |
| Liver                                           | 16.3                    | 0.0154        |
| Lungs                                           | 5.94                    | 0.00587       |
| Muscle                                          | 1.00                    | 0.00916       |
| Ovaries                                         |                         | 0.00261       |
| Pancreas                                        | 1.63                    | 0.00543       |
| Red Marrow                                      |                         | 0.00704       |
| Bone                                            | 2.12                    | 0.00229       |
| Skin                                            | 2.08                    | 0.00390       |
| Spleen                                          | 3.06                    | 0.00461       |
| Testes                                          |                         | 0.01830       |
| Thymus                                          |                         | 0.00354       |
| Thyroid                                         | 15.0                    | 0.00906       |
| Urinary Bladder Wall - 4-hr<br>Voiding Interval |                         | 0.652         |
| Uterus                                          |                         | 0.0614        |
| Total Body                                      |                         | 0.00950       |
| <b>Effective Dose (rem/mCi)</b>                 |                         | <b>0.0458</b> |

**Table S5.** Dosimetry Data for <sup>123</sup>I-MAPI in healthy athymic nude mice and the equivalent dose in humans

**Table S6**

|                | Vehicle |       | 24 hours |        | 1 week |        | 2 weeks |        |
|----------------|---------|-------|----------|--------|--------|--------|---------|--------|
|                | Mean    | SD    | Mean     | SD     | Mean   | SD     | Mean    | SD     |
| BUN (mg/dL)    | 23.00   | 5.29  | 26.00    | 4.58   | 23.33  | 4.62   | 28.00   | 1.00   |
| CREA (mg/dL)   | 0.17    | 0.04  | 0.26     | 0.04   | 0.20   | 0.08   | 0.20    | 0.02   |
| BUN/CREA Ratio | 132.93  | 2.41  | 100.43   | 16.96  | 116.30 | 17.39  | 143.23  | 16.49  |
| ALP (U/L)      | 73.00   | 2.00  | 82.67    | 4.93   | 79.67  | 1.53   | 81.67   | 7.23   |
| ALT (U/L)      | 30.00   | 3.61  | 32.00    | 7.00   | 36.33  | 4.62   | 51.33   | 43.09  |
| AST (U/L)      | 64.67   | 1.15  | 64.33    | 15.82  | 78.33  | 19.04  | 131.67  | 125.01 |
| GGT (U/L)      | 0.00    | 0.00  | 0.00     | 0.00   | 0.00   | 0.00   | 0.00    | 0.00   |
| TBIL (mg/dL)   | 0.10    | 0.00  | 0.20     | 0.00   | 0.10   | 0.00   | 0.10    | 0.00   |
| DBIL (mg/dL)   | 0.00    | 0.00  | 0.00     | 0.00   | 0.00   | 0.00   | 0.00    | 0.00   |
| IBIL (mg/dL)   | 0.10    | 0.00  | 0.20     | 0.00   | 0.10   | 0.00   | 0.10    | 0.00   |
| TP (g/dL)]     | 5.20    | 0.46  | 5.03     | 0.25   | 4.77   | 0.21   | 5.03    | 0.35   |
| ALB (g/dL)     | 3.03    | 0.25  | 3.07     | 0.21   | 2.97   | 0.12   | 2.97    | 0.06   |
| GLOB (g/dL)    | 2.17    | 0.21  | 1.97     | 0.06   | 1.80   | 0.10   | 2.07    | 0.31   |
| A/G Ratio      | 1.40    | 0.00  | 1.53     | 0.06   | 1.63   | 0.06   | 1.47    | 0.15   |
| P (mg/dL)      | 5.43    | 0.59  | 6.50     | 0.96   | 6.65   | 0.21   | 5.97    | 1.01   |
| Ca (mg/dL)     | 9.27    | 0.64  | 10.10    | 0.56   | 9.45   | 0.64   | 9.50    | 0.44   |
| GLU (mg/dL)    | 247.67  | 40.50 | 249.33   | 41.55  | 267.50 | 3.54   | 208.67  | 13.32  |
| CHOL (mg/dL)   | 80.67   | 7.02  | 90.67    | 2.52   | 84.00  | 1.41   | 76.00   | 4.00   |
| TRIG(mg/dL)    | 85.67   | 38.18 | 87.67    | 7.51   | 83.00  | 1.41   | 90.33   | 18.01  |
| CK (U/L)       | 166.67  | 77.39 | 223.67   | 150.04 | 270.00 | 178.47 | 101.33  | 83.77  |
| TCO2 (mEq/L)   | 17.33   | 1.53  | 19.67    | 2.08   | 15.50  | 2.12   | 16.67   | 0.58   |
| Na (mEq/L)     | 154.67  | 8.33  | 166.33   | 10.50  | 154.00 | 5.66   | 163.33  | 5.03   |
| K (mEq/L)      | 3.93    | 0.49  | 4.67     | 0.81   | 4.70   | 0.28   | 3.73    | 0.50   |
| CL (mEq/L)     | 114.00  | 4.36  | 119.33   | 7.02   | 112.50 | 3.54   | 119.33  | 3.06   |
| Na/K           | 40.00   | 6.56  | 36.33    | 4.04   | 33.00  | 2.83   | 44.33   | 6.51   |
| Anion Gap      | 27.67   | 2.08  | 32.00    | 2.65   | 31.00  | 4.24   | 31.00   | 2.00   |

**Table S6.** Complete Toxicity Report of <sup>123</sup>I-MAPi in healthy mice at 24 hours, 7 days, 14 days. 24 hour cohort, 1 week cohort and 2 weeks cohorts refer to the time between administration of <sup>123</sup>I-MAPi and time of sacrifice for analysis.

Figure S4

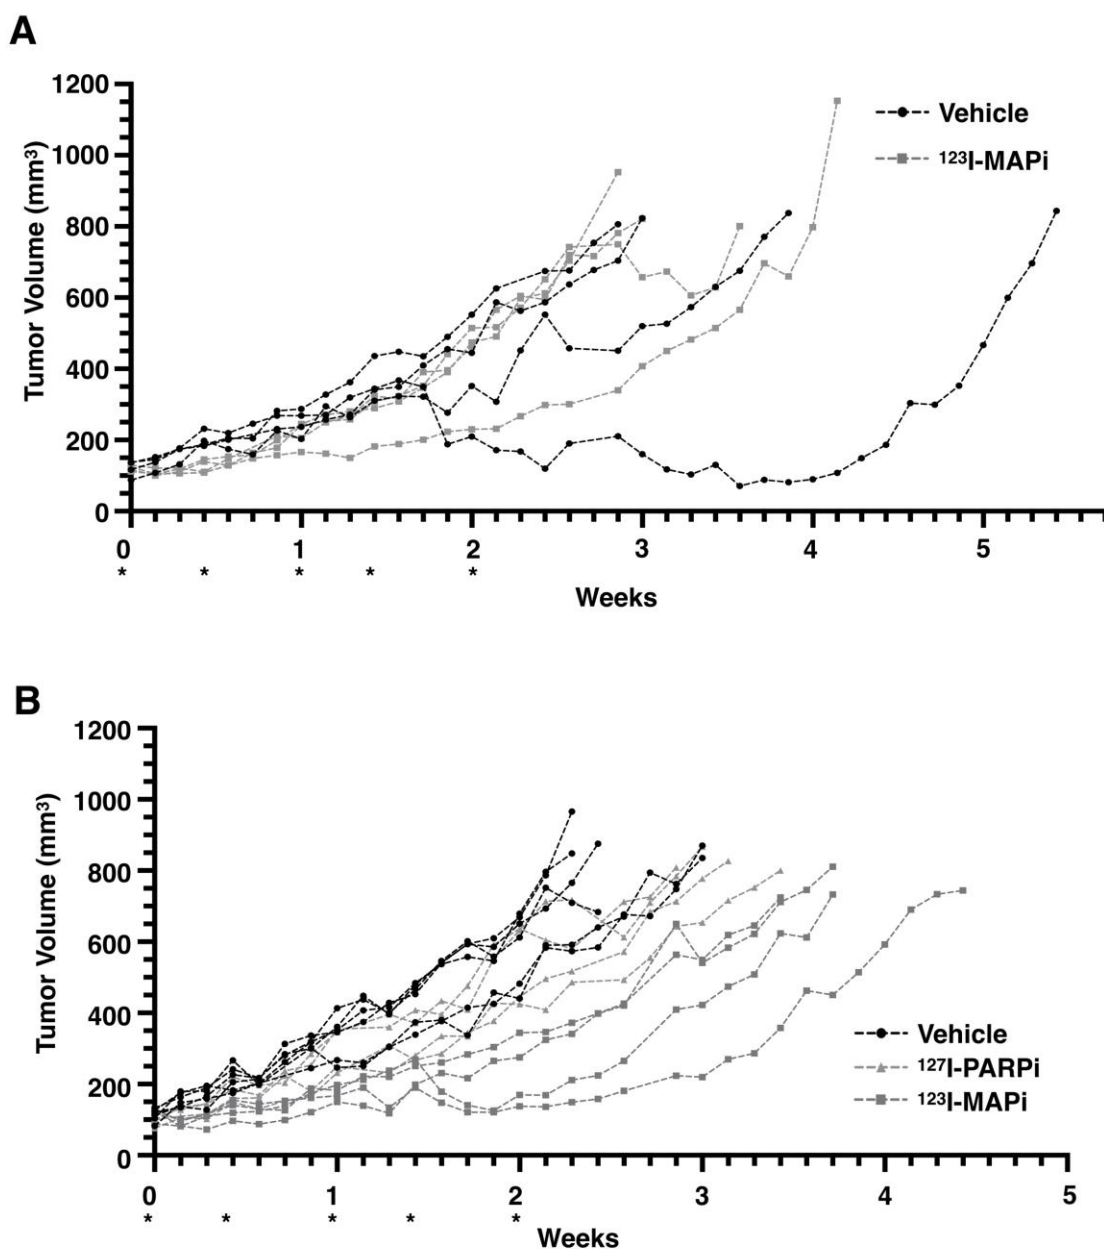

**Figure S4. Tumor growth curves of either HCT116 p53<sup>+/+</sup> or HCT116 p53<sup>-/-</sup> mouse models when treated with vehicle, <sup>127</sup>I-PARPi or <sup>123</sup>I-MAPi. (A) HCT116 p53<sup>+/+</sup> bearing mice treated intravenously with vehicle or 123I-MAPi at days 0, 3, 7, 10, 14. (B) HCT116 p53<sup>-/-</sup> bearing mice treated intravenously with vehicle, <sup>127</sup>I-PARPi or <sup>123</sup>I-MAPi at days 0, 3, 7, 10, 14. Athymic nude mice bearing tumors were treated every 3-4 days with either vehicle, <sup>127</sup>I-PARPi or <sup>123</sup>I-MAPi for 5 cycles of treatment with daily tumor volume measurements taken. \*Represents day of treatment.**

Figure S5

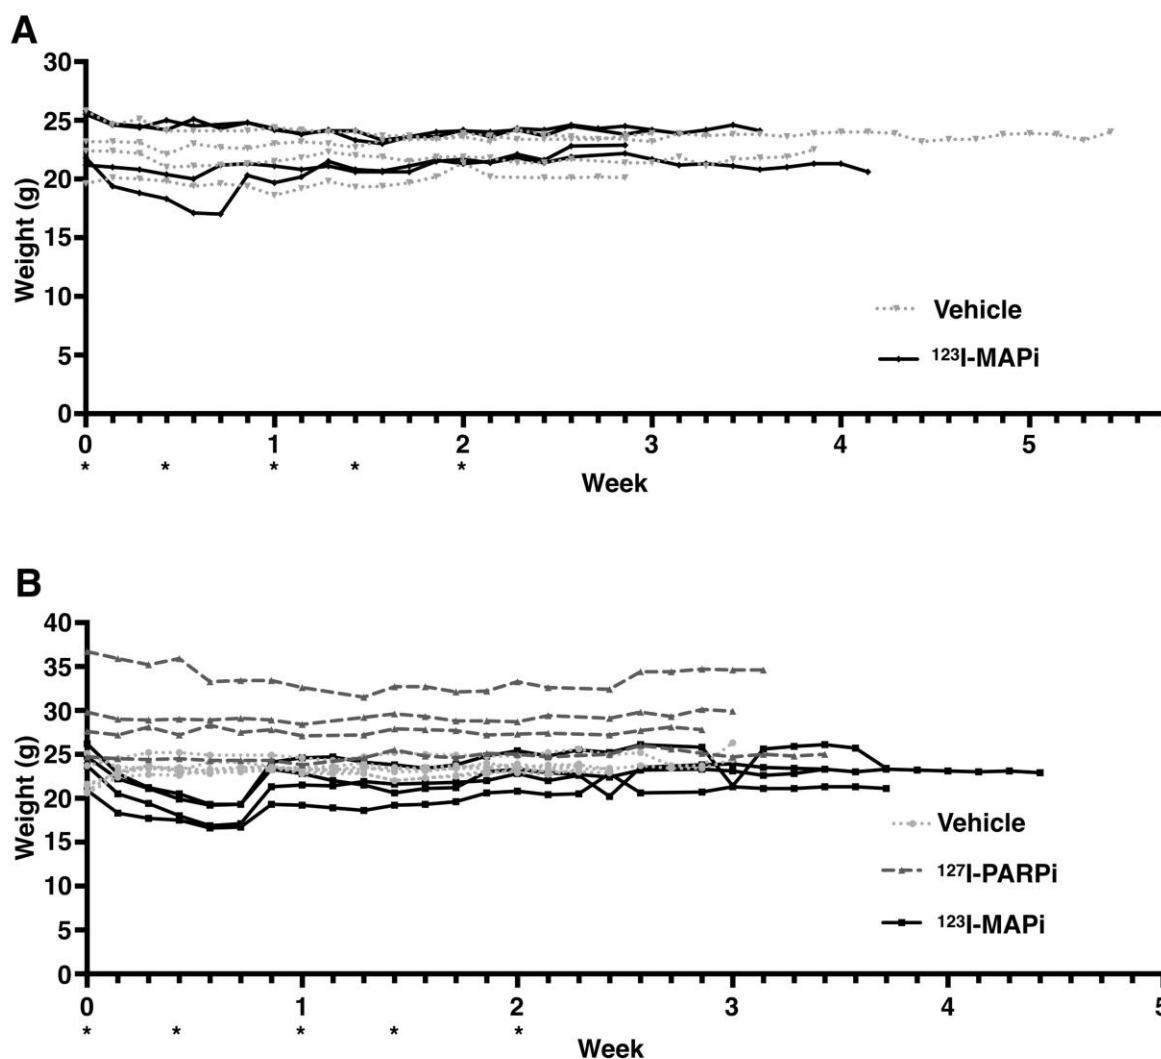

Figure S5. Weights of mice of either HCT116 p53<sup>+/+</sup> or HCT116 p53<sup>-/-</sup> mouse models when treated with vehicle,  $^{127}\text{I-PARPi}$  or  $^{123}\text{I-MAPi}$ . (A) HCT116 p53<sup>+/+</sup> bearing mice treated intravenously with vehicle or  $^{123}\text{I-MAPi}$  at days 0, 3, 7, 10, 14; (B) HCT116 p53<sup>-/-</sup> bearing mice treated intravenously with vehicle,  $^{127}\text{I-PARPi}$  or  $^{123}\text{I-MAPi}$  at days 0, 3, 7, 10, 14. Athymic nude mice bearing tumors were treated every 3-4 days with either vehicle,  $^{127}\text{I-PARPi}$  or  $^{123}\text{I-MAPi}$  for 5 cycles of treatment with daily body weight measurements taken. \*Represents day of treatment.
